# Supplementary material
Source: publisher figshare collection journal article supplement (https://sage.figshare.com/ndownloader/files/15254288)
Supplement: Supplementary file 1 [file 15254288]

## **Online Appendices**

### **Appendix A**

Data analyzed and presented in Tables 1, 2, and 3, and in the figures displayed within Appendixes B and C, were collected as part of a much larger research effort to assess city government capacity across the United States. As with any large-N, multi-year analysis of American cities, the collection of consistent, verifiable, annual data is a major challenge. We are nearing the end of year 1 of a multi-year, multi-pronged process. Not surprisingly, the sample analyzed and presented is driven in large measure by data availability. To be included, (1) city officials must have made a “sufficient” number of Comprehensive Annual Financial Reports (CAFR) available on the city government website, and (2) they must have included a “sufficient” amount of Full Time Equivalent (FTE) data within the CAFRs. Conceptually, “sufficient” means: enough data to effectively map patterns and annual change, from the early 2000s to the mid-2010s. Operationally, we grabbed all cities who made available at least 12 years of annual FTE data between 2000 and 2016 (or roughly 70 percent).

The second main criterion we applied to city selection for this paper is population-based, and the third is based on regional comparison. Cities with sufficient data were selected based on population size categories used by ICMA. We included cities with mean population between 250,000 and 1,000,000 for the analysis presented in Table 1 and Figure 1, and between 100,000 and 250,000 for the analysis presented in Table 2 and Figure 2. Each city we analyzed is in a Midwest state (census region 2), with the exception of two: Pittsburgh and Allentown, two Pennsylvania cities. We excluded cities from all other Northeastern states (census region 1), even those in the “Rust Belt”, due to the relationship between many city governments – particularly in the more urbanized

states (e.g., Massachusetts, Connecticut, New York) – and school districts. Simply put, many city governments in these states “run” city schools. In the Midwest, we know of only one city government, Chicago city government, that runs its city school district. Rather than subtract school district personnel from our city government capacity measure, we chose to exclude cities in these states altogether. This fundamental difference, based on state policy, inspired us to include Pennsylvania cities into our sample as Pennsylvania cities do not administer city schools. Ultimately, we grabbed all Midwestern cities between 250,000 and 1,000,000, with the exception of five – St. Louis, Columbus, Indianapolis, Milwaukee, and St. Paul do not make FTE data available in their CAFRs. This is a coverage rate of 62 percent. We added Pittsburgh and Buffalo, New York, to round out the sample as these cities have very similar economic histories as Detroit.

Our coverage of mid-sized cities – those between 100,000 and 250,000 – is 50 percent. In other words, 32 Midwestern cities have a 2000-2016 average annual population that fit this population category; we have acceptable data for 16 of them. A simple pairwise comparison of population means of the two groups, yields no meaningful difference between the cities for which we have FTE data and the cities who do not report FTE data in their CAFRs ( $t = -0.72$ ,  $p = 0.475$ ).

## Appendix B

**Figure B1. FTEs per 10,000 Residents (loess, bandwidth=.25), 2000-2016, for Midwestern Cities with Mean Population between 250,000 and 1,000,000.**

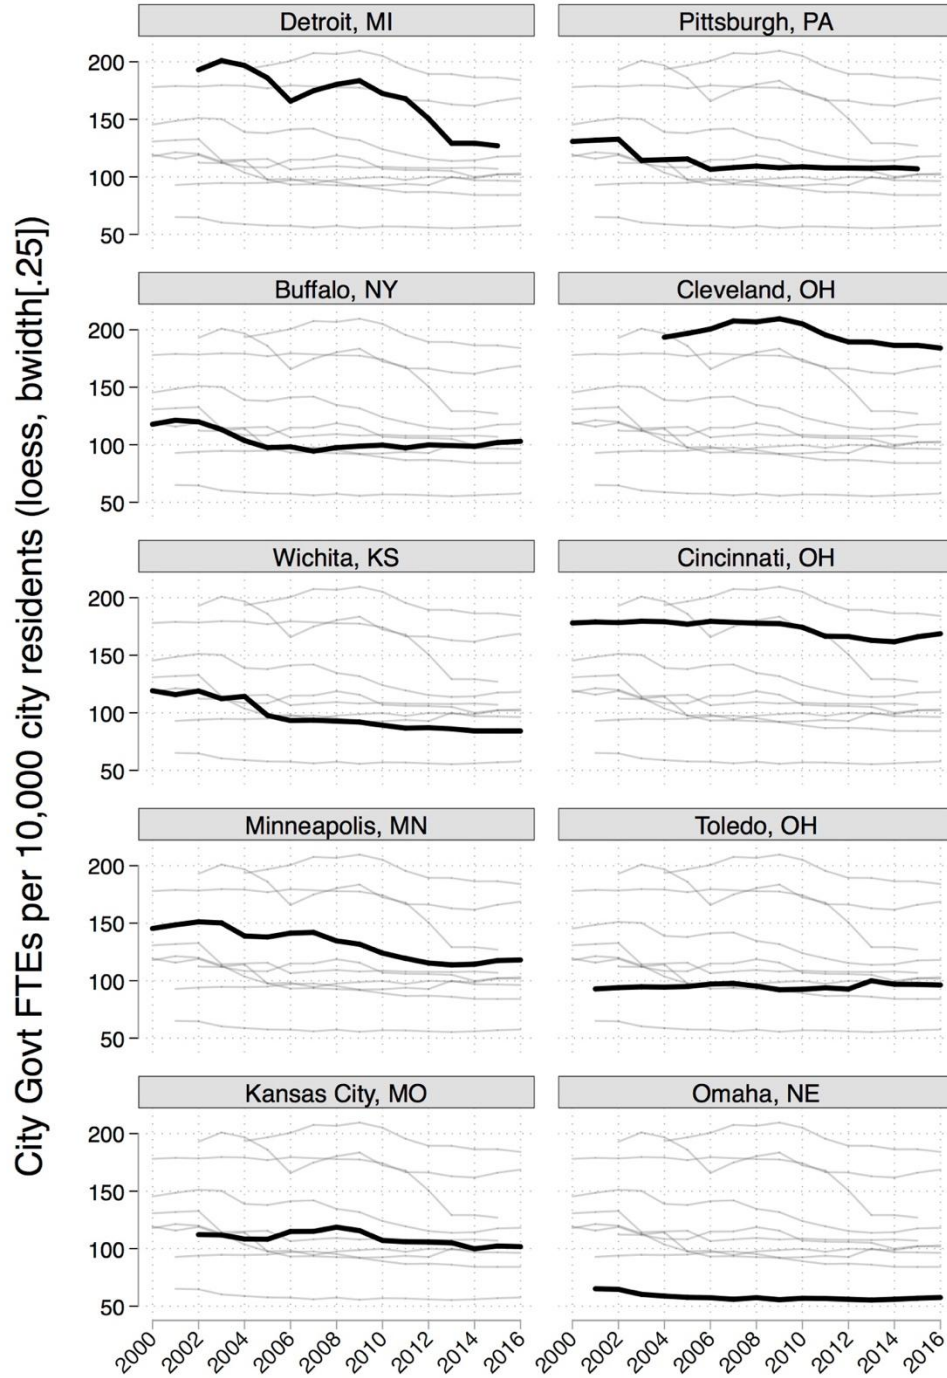

### Notes

Panels are sorted by mean annual percent change in City Government FTEs.

## Appendix C

**Figure C1. FTEs per 10,000 Residents (loess, bandwidth=.25), 2000-2016, for Midwestern Cities with Mean Population between 100,000 and 250,000.**

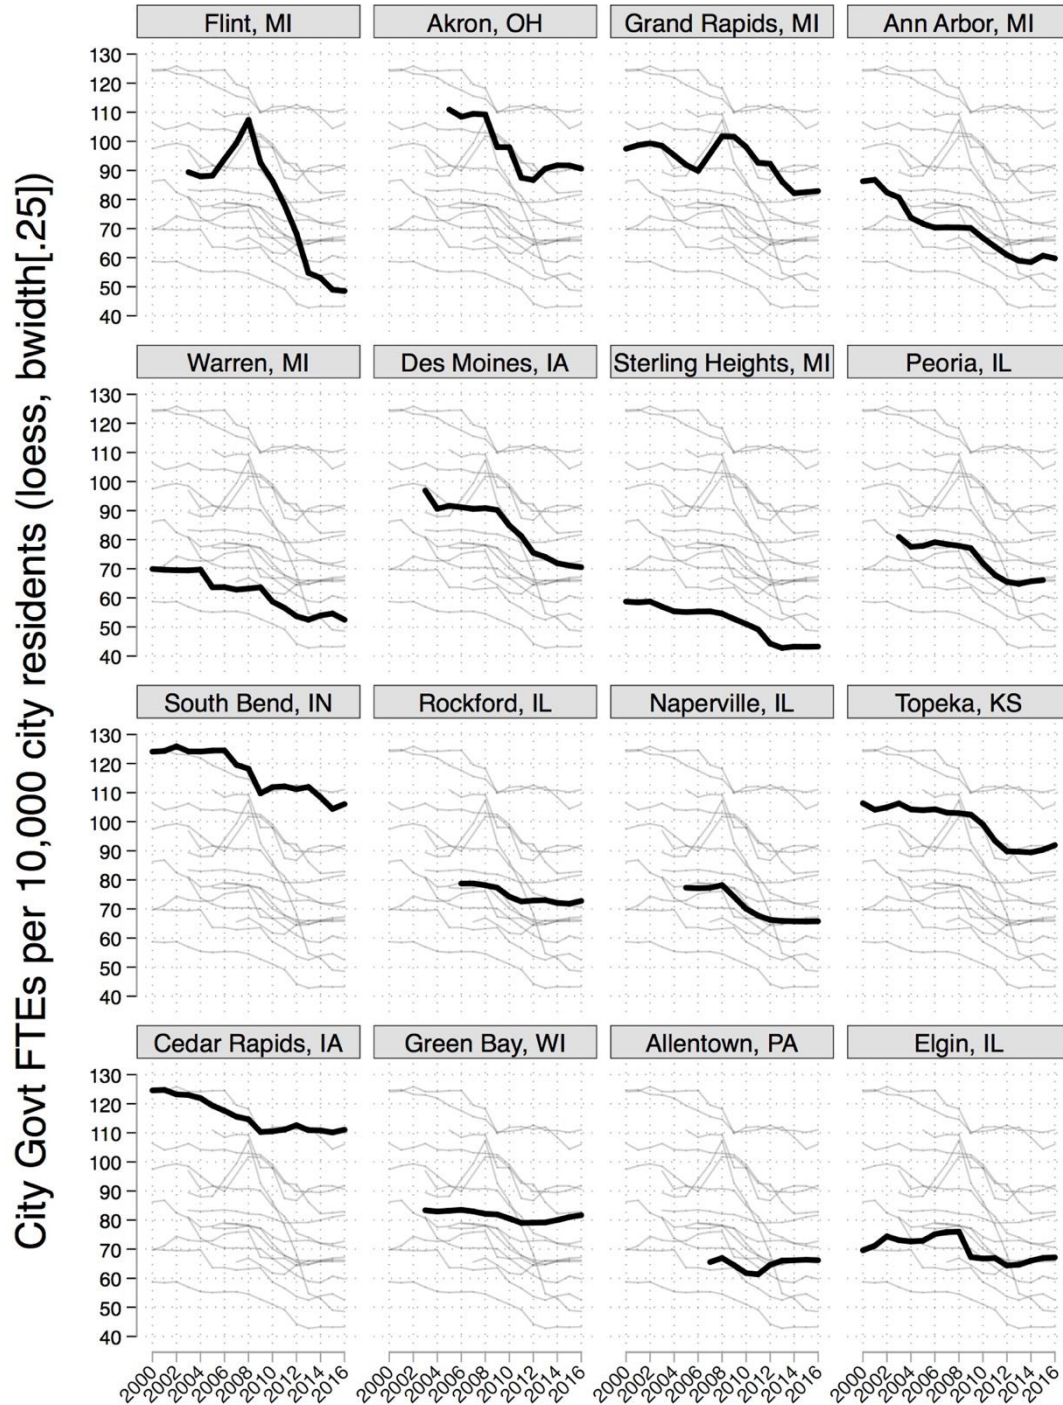

### Notes

Panels are sorted by mean annual percent change in City Government FTEs.

## Appendix D

**Table D1. Coding the Specific Function/Program Categories Listed in Each City's CAFR.**

| <b>Functional Category <sup>a</sup></b> | <b>Detroit CAFR Function/Program <sup>b</sup></b> | <b>Flint CAFR Function/Program <sup>b</sup></b>  |
|-----------------------------------------|---------------------------------------------------|--------------------------------------------------|
| Community and Economic Development      | Civic Center                                      | Community & Economic Development/Major Grants    |
|                                         | Workforce Development                             |                                                  |
|                                         | Planning & Development                            |                                                  |
|                                         | Housing                                           |                                                  |
| General Government                      | 36th District Court                               | 68th District Court                              |
|                                         | Administrative Hearings                           | Administration                                   |
|                                         | Auditor General                                   | Assessment                                       |
|                                         | Board Of Zoning Appeals                           | Budget Management                                |
|                                         | Budget                                            | City Administration                              |
|                                         | City Clerk                                        | City Clerk's Office (Including Election Workers) |
|                                         | City Council                                      | City Council                                     |
|                                         | Communication & Creative Services                 | City Market                                      |

|                                 |                                             |
|---------------------------------|---------------------------------------------|
| Consumer Affairs                | Civil Service Commission                    |
| Elections                       | Equal Opportunity/Contract Compliance       |
| Finance                         | Finance<br>Department/Payroll/Retirement    |
| Human Resources                 | Human Relations Commission                  |
| Information Technology Services | Human Resources-Personnel & Labor Relations |
| Inspector General               | Information Services/Data Processing        |
| Law                             | Insurance Risk & Benefits Management        |
| Mayor's Office                  | Inventory Control/Stockkeepers              |
| Ombudsman                       | Legal Department                            |
|                                 | Mayor's Office                              |
|                                 | Mayor's Office on Human Services            |
|                                 | Ombudsman's Office                          |
|                                 | Public Service Attendants                   |
|                                 | Treasury/Customer Service/Income Tax        |
|                                 | Union Representatives                       |

---

Health and Welfare

Environmental

n/a

Health & Wellness Promotion

Human Services

Senior Citizens

Youth

---

|                                |                      |                                |
|--------------------------------|----------------------|--------------------------------|
| Parks, Recreation, and Culture | Arts                 | Administration                 |
|                                | Cultural Affairs     | Facilities Maintenance/Grounds |
|                                | General Services     | Forestry Division              |
|                                | Historical           | Golf Division                  |
|                                | Library              | IMA Sports Arena               |
|                                | Recreation           | Recreation Division            |
|                                | Zoological Institute |                                |

---

|               |                   |                                         |
|---------------|-------------------|-----------------------------------------|
| Public Safety | Fire              | Civilians                               |
|               | Building & Safety | Emergency 9-1-1                         |
|               | Homeland Security | Fire Department                         |
|               | Human Rights      | Jail-Security Guards/Admin              |
|               | Police            | Public Works & Utilities Administration |
|               |                   | Sworn Officers                          |

---

|              |                              |                                                 |
|--------------|------------------------------|-------------------------------------------------|
| Public Works | Airport                      | Building Inspections/<br>Development/Demolition |
|              | Department of Transportation | Engineering                                     |
|              | Municipal Parking            | Fleet Management                                |
|              | Public Lighting              | Sewer Maintenance                               |
|              | Public Works                 | Street Maintenance                              |
|              | Water & Sewage Disposal      | Traffic Engineering                             |
|              |                              | Transportation-Director/<br>Administration      |
|              |                              | Utilities Administration                        |
|              |                              | Waste Collection/Sanitation                     |
|              |                              | Water Plant                                     |
|              |                              | Water Pollution Control                         |
|              |                              | Water Service Center                            |

---

**Notes**

Cell entries are the functions and programs used to classify and enumerate all Full-time Equivalent Government Employees in each city. We report these functions and programs exactly as they appear in the Operating Information section of each city's CAFR.

<sup>a</sup> Functional categories are sorted alphabetically in ascending order

<sup>b</sup> Functions and programs are sorted alphabetically in ascending order

---
